# Supplementary material
Source: Research Square preprint supplement (doi:10.21203/rs.3.rs-8525314/v1)
Supplement: Supplementary file 1 [file 4ae4cd52d256765baaf7917a.docx]

**[TITLE] Beyond the High: Methamphetamine Use, Risk Landscape, Health Consequences and Urgent Policy Directions from a Mixed‑Methods Situational Analysis in Sudan**

[**Authors and Affiliations]**

**Mohamed A. Moniem M.H. Bashir** 1,2 | ORCID iD: ‪0009-0004-4284-7864‬‬‬‬‬

1Sudan Federal ministry of Health

2Sudan Medical Specialization Board

**Rusdi Abd Rashid** 3,4 | ORCID iD: ‪0000-0002-1295-7382‬‬‬‬‬

3 Head, University of Malaya Center of Addiction Sciences

4 Department of Psychological, Faculty of Medicine, University of Malaya

**[SUBTITLE] Supplementary Appendices**

**[SUBHEADING] Appendix A Risk of Bias Table**

| **Domain** | **Assessment** | **Rationale** | **Likely Direction of Bias** | **Mitigation Applied** |
| --- | --- | --- | --- | --- |
| **Selection bias** | Moderate | Facility registries limited to Khartoum, Port Sudan and Kassala; other states lack data | Overrepresentation of clinic‑attending cases; geographic bias toward sampled states | Clear inclusion criteria; sensitivity analyses excluding high‑missingness facilities; limitations noted in manuscript |
| **Sampling frame bias** | High | No population‑based sampling; admissions reflect help‑seeking population only | Underestimates community cases who do not seek care; skews severity toward more severe presentations | Triangulation with NGO reports and expert interviews to contextualise facility data |
| **Information bias Exposure misclassification** | Moderate | Substance identification based on clinical records and self‑report; limited toxicology confirmation | Possible misclassification between methamphetamine and other stimulants; nondifferential misclassification likely attenuates associations | Standardised extraction form; cross‑checking clinical notes; flagging records with laboratory confirmation |
| **Information bias Outcome measurement** | Low–Moderate | Clinical outcomes recorded inconsistently across facilities | Differential outcome ascertainment may bias complication rates | Harmonised outcome definitions in codebook; sensitivity analyses excluding poorly documented outcomes |
| **Recall bias** | Moderate | Duration of use and psychosocial history often self‑reported at admission | Over‑ or under‑reporting of duration and exposures; may affect associations with chronic outcomes | Use of categorical duration bands to reduce recall error; triangulation with family reports when available |
| **Confounding Measured** | Moderate | Limited measurement of socioeconomic covariates and comorbid substance use | Residual confounding may inflate associations between meth use and adverse outcomes | Adjusted descriptive comparisons where covariates available; stratified summaries by polysubstance use |
| **Confounding Unmeasured** | High | Important confounders such as childhood trauma, detailed income, and community violence not systematically captured | Potential for biased inference about causal drivers and health outcomes | Delphi and qualitative data used to contextualise and interpret quantitative findings |
| **Reporting bias** | Low–Moderate | Facilities may underreport sensitive outcomes such as legal encounters or sexual violence | Underestimation of social harms | Encouraged standardised reporting; acknowledged in limitations |
| **Overall risk of bias** | Moderate–High | Combination of facility‑based sampling, limited geographic coverage and incomplete covariate measurement | Findings should be interpreted as facility‑based estimates and hypothesis‑generating for national surveillance | Transparent documentation of data sources, codebook and sensitivity analyses; recommendation for national registry development |

**[SUBHEADING] Appendix B Delphi Questionnaire, Procedures and Round Summaries**

**B.1 Delphi Questionnaire Final Instrument**

**Instructions:** Rate the importance of each factor as a driver of methamphetamine use in Sudan on a scale from **1 (not important)** to **9 (critically important)**. Add brief comments where relevant.

1. Socioeconomic hardship poverty and unemployment
2. Conflict and displacement
3. Trauma and post‑conflict stress
4. Peer influence and social networks
5. Availability and trafficking across porous borders
6. Weak law enforcement and corruption
7. Cultural stigma and barriers to care
8. Lack of public awareness and education
9. Mental health comorbidity depression PTSD anxiety
10. Easy access to precursor chemicals or counterfeit tablets
11. Urbanisation and youth unemployment clusters
12. School dropout and lack of recreational alternatives
13. Media and social media influences normalising use
14. Polysubstance use patterns
15. Other specify and rate

**B.2 Delphi Procedures Summary**

- **Panel composition:** 12 experts (addiction psychiatrists, rehabilitation clinicians, public‑health specialists, NGO programme leads).
- **Round 1:** Open listing of perceived risk factors; qualitative synthesis consolidated raw items into a 15‑item list.
- **Round 2:** Structured scoring using the 1–9 importance scale; panelists provided comments and suggested minor rewording.
- **Round 3:** Feedback report showing Round 2 medians and IQRs; panelists re‑scored items and provided final comments.
- **Consensus rule:** Median ≥ 7 and IQR ≤ 2 indicated consensus for high importance. Items not meeting consensus retained as “important but uncertain.”
- **Anonymity and feedback:** Responses anonymised; controlled feedback provided between rounds to reduce dominance bias.

**B.3 Round Summaries**

| **Round** | **Activity** | **Key Outputs** |
| --- | --- | --- |
| Round 1 | Open listing and free text responses | 28 raw items consolidated to 15 distinct risk factors |
| Round 2 | Structured scoring (1–9) with comments | Medians and IQRs for each item; preliminary ranking; items with wide IQR flagged |
| Round 3 | Feedback and re‑scoring | Final medians and IQRs; consensus achieved on core items; qualitative rationales recorded |

**B.4 Selected Round Results**

| **Risk Factor** | **Round 2 Median** | **Round 2 IQR** | **Round 3 Median** | **Consensus** |
| --- | --- | --- | --- | --- |
| Socioeconomic hardship | 9 | 1 | 9 | Yes |
| Trauma and conflict stress | 8 | 2 | 8 | Yes |
| Peer influence | 8 | 2 | 8 | Yes |
| Availability trafficking | 8 | 3 | 8 | Yes |
| Stigma and cultural barriers | 7 | 2 | 7 | Yes |
| Weak law enforcement corruption | 7 | 3 | 7 | Yes |
| Media social media influence | 5 | 3 | 5 | No |

**Panel commentary highlights:** Experts emphasised the interacting nature of economic drivers and psychosocial stressors, the amplifying role of porous borders and the need to prioritise youth‑focused prevention and surveillance.

**[SUBHEADING] Appendix C Variable List and Definitions**

| **Variable** | **Type** | **Allowed Values** | **Description** |
| --- | --- | --- | --- |
| residence_state | Categorical | Khartoum; Red Sea; Kassala; Other | State of residence at admission |
| primary_substance | Categorical | Methamphetamine; Opioids; Cannabis; Alcohol; Polysubstance; Other | Primary substance reported or clinically identified |
| route_of_administration | Categorical | Smoked; Snorted; Injected; Oral; Unknown | Primary route reported |
| duration_of_use_months | Integer | 0–99 | Reported duration of primary substance use in months |
| comorbid_psychiatric_dx | Categorical | None; Psychosis; Depression; Anxiety; PTSD; Other | Clinician‑recorded comorbid psychiatric diagnosis |
| medical_complications | Categorical | None; Meth mouth; Skin ulceration; Stroke; Cardiac event; Other | Key medical complications recorded at admission or during stay |
| treatment_provided | Categorical | Detoxification; Psychosocial therapy; Pharmacotherapy; Referral; None | Primary treatment modality recorded |
| discharge_outcome | Categorical | Completed detox; Referred; Left against advice; Deceased | Outcome at discharge |
| readmission_12m | Binary | Y; N | Readmission within 12 months for substance use |
| laboratory_confirmation | Categorical | Confirmed; Not confirmed; Not done | Toxicology confirmation status for methamphetamine |
| legal_encounter | Binary | Y; N | Any documented legal encounter related to substance use |
| employment_status | Categorical | Employed; Unemployed; Student; Other | Employment or occupational status at admission |
| education_level | Categorical | None; Primary; Secondary; Tertiary; Unknown | Highest completed education level |
| housing_status | Categorical | Stable; Displaced; Homeless; Other | Housing situation at admission |
| notes_free_text | Text | Free text | Clinician free‑text notes de‑identified before storage |

**[SUBHEADING] Appendix D Expanded Data Availability Statement**

**D.1 Data Types Available**

De‑identified facility registry data, anonymised Delphi scoring sheets, aggregated summary tables, the full codebook and the qualitative interview guide are available on request. Individual interview transcripts are not publicly shared to protect participant confidentiality.

**D.2 Access Conditions**

Data are available to bona fide researchers for non‑commercial research purposes subject to:

- A signed data‑use agreement;
- Institutional ethics approval or exemption for secondary analysis;
- Adherence to specified data security and confidentiality requirements.

**D.3 Request Process**

To request data, contact the corresponding author with:

- A brief research proposal describing objectives and planned analyses;
- Institutional affiliation and ethics approval documentation;
- A signed data‑use agreement template.
  Requests are reviewed by the study data governance committee and responded to within **4–6 weeks**.

**D.4 Data Formats and Documentation**

Shared datasets will be provided in **CSV** format with **UTF‑8** encoding. Accompanying documentation includes: the full codebook, variable definitions, data cleaning log and analytic scripts used for primary analyses. Aggregated tables and figures from the manuscript are included.

**D.5 Ethical and Legal Restrictions**

Patient‑level identifiers have been removed. Small‑cell suppression will be applied to any shared tables where re‑identification risk exists. Data sharing complies with contributing facilities’ data‑use agreements and applicable national regulations. Sensitive variables such as free‑text clinician notes will be redacted or withheld unless specific consent and additional approvals are provided.

**D.6 Timeline Retention and Termination**

Approved data recipients receive access for a defined project period (typically **12 months**) with options to request extensions. Recipients must destroy or return data at the end of the access period and certify destruction.

**D.7 Code and Materials**

Analysis code used to generate tables and figures is available on request in **R** and **Python** formats. The Delphi questionnaire instrument and the interview guide are provided as supplementary materials upon request.

**D.8 Contact for Requests**

Direct data requests to the corresponding author at the institutional email provided in the manuscript. Use the subject line: **Data request — Methamphetamine Sudan study**.

**D.9 Limitations on Reuse**

Data may not be used for commercial product development or activities that could harm participants or communities. Any secondary publication using shared data must acknowledge the original study and notify the study team prior to submission.

**End of Supplementary Appendices**
